# Supplementary material for: Effects of environmental radiation on testes and spermatogenesis in wild large Japanese field mice (Apodemus speciosus) from Fukushima
Source: PubMed Central journal article supplement (PMC4804236; doi:10.1038/srep23601), 2016-03-23
Supplement: srep23601-s1.pdf [file srep23601-s1.pdf]

**Scientific Reports**

**Supplemental information**

**Title: Effects of environmental radiation on testes and spermatogenesis in wild large Japanese field mice (*Apodemus speciosus*) from Fukushima.**

Tsukasa OKANO, Hiroko ISHINIWA, Manabu ONUMA, Junji SHINDO, Yasushi YOKOHATA, Masanori TAMAOKI

**Table S1.** The number of mice used in each experiment.

|                    | Radioactivity concentration |      | Germ cell apoptosis, seminiferous diameter |      | Abnormal morphology of sperm |      |
|--------------------|-----------------------------|------|--------------------------------------------|------|------------------------------|------|
|                    | 2013                        | 2014 | 2013                                       | 2014 | 2013                         | 2014 |
| Site 1 (Fukushima) | 12                          | 10   | 12                                         | 6    | 14                           | 10   |
| Site 2 (Fukushima) | 4                           | 8    | 4                                          | 6    | 5                            | 8    |
| Site 3 (Aomori)    | 10                          | 5    | 25                                         | 5    | 27                           | 5    |
| Site 4 (Toyama)    | 10                          | 8    | 17                                         | 6    | 20                           | 8    |

**Table S2.** Information on radiocesium ( $^{134}\text{Cs}$  and  $^{137}\text{CS}$ ) concentration measurements in the examined mice

| Capture Site          | Capture month, year | Sample number | Radiocesium concentration (Bq/kg)<br>Median (minimum – maximum) |
|-----------------------|---------------------|---------------|-----------------------------------------------------------------|
| Site 1<br>(Fukushima) | Jul, 2013           | 2             | 6,954 – 7,637                                                   |
|                       | Aug, 2013           | 9             | 6,392 (5,106 – 11,943)                                          |
|                       | Sep, 2013           | 1             | 6,624                                                           |
|                       | Aug, 2014           | 8             | 17,082 (4,014 – 54,038)                                         |
| Site 2<br>(Fukushima) | Jul, 2013           | 1             | 2,514                                                           |
|                       | Aug, 2013           | 2             | 3,585 – 4,806                                                   |
|                       | Sep, 2013           | 1             | 5,527                                                           |
|                       | Aug, 2014           | 8             | 8,785 (3,409 – 30,218)                                          |
| Site 3<br>(Aomori)    | Aug, 2013           | 5             | 4 (0 – 33)                                                      |
|                       | Sep, 2013           | 5             | 4 (3 – 6)                                                       |
|                       | Apr, 2014           | 3             | 8 (3 – 8)                                                       |
|                       | Aug, 2014           | 2             | 4 – 5                                                           |
| Site 4<br>(Toyama)    | Aug, 2013           | 10            | 0 (0 – 3)                                                       |
|                       | Jul, 2014           | 1             | 2                                                               |
|                       | Aug, 2014           | 7             | 0 (0 – 6)                                                       |
